# Supplementary material for: Improved shrunken centroid classifiers for high-dimensional class-imbalanced data
Source: PubMed Central journal article supplement (PMC3687811; doi:10.1186/1471-2105-14-64), 2013-02-23

Table 1: **Classification results obtained after over-sampling the training set.** The table shows optimal threshold parameter ( $\lambda^*$ ), number of active irrelevant variables ( $\#$  non-info), predictive accuracy (PA), PA for class 1 ( $PA_1$ ) and PA for class 2 ( $PA_2$ ), g-means and AUC for different levels of class-imbalance ( $k_1$ ) in the training set containing 100 samples and difference between the classes ( $\mu_2$ ). The training set was over-sampled in order to obtain a class-balanced training set. There were 10,000 variables ( $p = 10,000$ ) and the correlation coefficient for the variables within the same block containing 100 variables was set to 0.8. See text for more details.

| $\mu_2$ | $k_1$ |        | PA             | $PA_1$         | $PA_2$         | g-means        | AUC            | # info           | # non-info           | $\lambda$            |                |
|---------|-------|--------|----------------|----------------|----------------|----------------|----------------|------------------|----------------------|----------------------|----------------|
| 0       | 0.5   | PAM    | 0.5<br>(0.01)  | 0.5<br>(0.04)  | 0.5<br>(0.04)  | 0.5<br>(0.01)  | 0.5<br>(0.02)  | 22.04<br>(37.49) | 2019.31<br>(3328.64) | 1.18<br>(0.67)       |                |
|         |       | GM-PAM | 0.5<br>(0.02)  | 0.5<br>(0.04)  | 0.5<br>(0.05)  | 0.5<br>(0.02)  | 0.5<br>(0.02)  | 24.71<br>(38.43) | 2242.56<br>(3436.9)  | 1.13<br>(0.68)       |                |
|         | 0.6   | PAM    | 0.5<br>(0.01)  | 0.62<br>(0.06) | 0.38<br>(0.06) | 0.48<br>(0.02) | 0.5<br>(0.02)  | 51.87<br>(42.05) | 4795.4<br>(3573.33)  | 0.68<br>(0.7)        |                |
|         |       | GM-PAM | 0.5<br>(0.01)  | 0.62<br>(0.06) | 0.37<br>(0.06) | 0.48<br>(0.02) | 0.5<br>(0.02)  | 54.18<br>(41.99) | 5037.92<br>(3592.46) | 0.64<br>(0.69)       |                |
|         | 0.7   | PAM    | 0.5<br>(0.01)  | 0.74<br>(0.05) | 0.27<br>(0.06) | 0.44<br>(0.03) | 0.5<br>(0.02)  | 61.92<br>(38.43) | 5799.99<br>(2915.88) | 0.49<br>(0.54)       |                |
|         |       | GM-PAM | 0.5<br>(0.01)  | 0.74<br>(0.05) | 0.27<br>(0.06) | 0.44<br>(0.03) | 0.5<br>(0.02)  | 62.65<br>(38.56) | 5911.31<br>(2939.22) | 0.48<br>(0.54)       |                |
|         | 0.8   | PAM    | 0.5<br>(0.01)  | 0.84<br>(0.04) | 0.15<br>(0.04) | 0.36<br>(0.04) | 0.5<br>(0.02)  | 71.32<br>(31.71) | 6847.44<br>(2450.68) | 0.37<br>(0.33)       |                |
|         |       | GM-PAM | 0.5<br>(0.01)  | 0.84<br>(0.04) | 0.15<br>(0.04) | 0.36<br>(0.04) | 0.5<br>(0.02)  | 71.52<br>(31.75) | 6921.11<br>(2483.02) | 0.36<br>(0.33)       |                |
|         | 0.9   | PAM    | 0.5<br>(0.01)  | 0.95<br>(0.02) | 0.05<br>(0.02) | 0.22<br>(0.04) | 0.5<br>(0.02)  | 61.37<br>(37.62) | 6026.48<br>(2742.67) | 0.69<br>(0.56)       |                |
|         |       | GM-PAM | 0.5<br>(0.01)  | 0.95<br>(0.02) | 0.05<br>(0.02) | 0.21<br>(0.04) | 0.5<br>(0.02)  | 62.69<br>(36.69) | 6127.63<br>(2651.88) | 0.67<br>(0.53)       |                |
|         | 0.5   | 0.5    | PAM            | 0.55<br>(0.05) | 0.55<br>(0.06) | 0.56<br>(0.06) | 0.55<br>(0.05) | 0.58<br>(0.06)   | 41.58<br>(44.16)     | 1521.02<br>(2956.5)  | 1.34<br>(0.71) |
|         |       |        | GM-PAM         | 0.55<br>(0.05) | 0.55<br>(0.06) | 0.55<br>(0.06) | 0.55<br>(0.05) | 0.58<br>(0.06)   | 45.42<br>(45.04)     | 1651.47<br>(3051.22) | 1.28<br>(0.7)  |
|         |       | 0.6    | PAM            | 0.54<br>(0.04) | 0.65<br>(0.06) | 0.44<br>(0.09) | 0.53<br>(0.04) | 0.56<br>(0.05)   | 76.58<br>(36.56)     | 4244.76<br>(3526.27) | 0.81<br>(0.81) |
|         |       |        | GM-PAM         | 0.54<br>(0.04) | 0.65<br>(0.06) | 0.43<br>(0.09) | 0.53<br>(0.04) | 0.56<br>(0.05)   | 77.71<br>(35.82)     | 4500.95<br>(3609.07) | 0.76<br>(0.79) |
|         |       | 0.7    | PAM            | 0.53<br>(0.02) | 0.75<br>(0.05) | 0.31<br>(0.07) | 0.48<br>(0.04) | 0.55<br>(0.03)   | 91.95<br>(22.71)     | 5468.92<br>(2926.65) | 0.51<br>(0.47) |
|         |       |        | GM-PAM         | 0.53<br>(0.02) | 0.75<br>(0.05) | 0.31<br>(0.06) | 0.48<br>(0.04) | 0.55<br>(0.03)   | 93.32<br>(20.39)     | 5759.93<br>(2888.1)  | 0.46<br>(0.43) |
|         |       | 0.8    | PAM            | 0.52<br>(0.02) | 0.85<br>(0.04) | 0.19<br>(0.05) | 0.4<br>(0.05)  | 0.55<br>(0.03)   | 95.17<br>(15.11)     | 5993.06<br>(2564.83) | 0.48<br>(0.35) |
|         |       |        | GM-PAM         | 0.52<br>(0.02) | 0.85<br>(0.04) | 0.19<br>(0.05) | 0.4<br>(0.05)  | 0.55<br>(0.03)   | 95.42<br>(15.07)     | 6203.27<br>(2576.17) | 0.46<br>(0.35) |
| 0.9     |       | PAM    | 0.51<br>(0.01) | 0.95<br>(0.02) | 0.06<br>(0.04) | 0.24<br>(0.06) | 0.53<br>(0.03) | 82.72<br>(25.81) | 6012.49<br>(2688.55) | 0.69<br>(0.54)       |                |
|         |       | GM-PAM | 0.51<br>(0.01) | 0.95<br>(0.02) | 0.06<br>(0.03) | 0.24<br>(0.06) | 0.53<br>(0.03) | 83.95<br>(25.24) | 6161.64<br>(2631.05) | 0.65<br>(0.51)       |                |
| 1       |       | 0.5    | PAM            | 0.69<br>(0.03) | 0.69<br>(0.05) | 0.69<br>(0.05) | 0.69<br>(0.03) | 0.77<br>(0.04)   | 46.46<br>(42.87)     | 479.55<br>(1525.94)  | 2.16<br>(0.94) |
|         |       |        | GM-PAM         | 0.69<br>(0.03) | 0.69<br>(0.05) | 0.7<br>(0.05)  | 0.69<br>(0.03) | 0.76<br>(0.04)   | 50.47<br>(42.49)     | 513.59<br>(1532.66)  | 2.1<br>(0.94)  |
|         |       | 0.6    | PAM            | 0.68<br>(0.04) | 0.73<br>(0.04) | 0.63<br>(0.08) | 0.67<br>(0.04) | 0.74<br>(0.05)   | 70.97<br>(42.27)     | 1690.36<br>(2251.51) | 1.72<br>(1.34) |
|         |       |        | GM-PAM         | 0.68<br>(0.04) | 0.73<br>(0.04) | 0.62<br>(0.09) | 0.67<br>(0.04) | 0.74<br>(0.05)   | 73.08<br>(41.41)     | 1808.83<br>(2341.65) | 1.67<br>(1.33) |
|         |       | 0.7    | PAM            | 0.63<br>(0.05) | 0.79<br>(0.04) | 0.48<br>(0.12) | 0.61<br>(0.07) | 0.7<br>(0.06)    | 91.13<br>(26.49)     | 3848.5<br>(3113.97)  | 0.96<br>(1.02) |
|         |       |        | GM-PAM         | 0.63<br>(0.05) | 0.79<br>(0.04) | 0.47<br>(0.12) | 0.6<br>(0.07)  | 0.69<br>(0.06)   | 93.71<br>(22.79)     | 4157.24<br>(3103.25) | 0.87<br>(0.96) |
|         |       | 0.8    | PAM            | 0.6<br>(0.05)  | 0.86<br>(0.04) | 0.33<br>(0.14) | 0.52<br>(0.09) | 0.67<br>(0.06)   | 97.33<br>(15.13)     | 5429.52<br>(3103.96) | 0.7<br>(0.85)  |
|         |       |        | GM-PAM         | 0.59<br>(0.05) | 0.87<br>(0.04) | 0.31<br>(0.13) | 0.51<br>(0.09) | 0.67<br>(0.06)   | 97.38<br>(15.12)     | 5797.09<br>(3019.79) | 0.63<br>(0.83) |
|         | 0.9   | PAM    | 0.54<br>(0.03) | 0.95<br>(0.03) | 0.12<br>(0.09) | 0.32<br>(0.09) | 0.62<br>(0.06) | 96.17<br>(13.01) | 5651.55<br>(2577.79) | 0.81<br>(0.78)       |                |
|         |       | GM-PAM | 0.53<br>(0.03) | 0.95<br>(0.03) | 0.12<br>(0.09) | 0.32<br>(0.09) | 0.62<br>(0.05) | 96.17<br>(13.01) | 5789.34<br>(2616.25) | 0.78<br>(0.78)       |                |

Figure 1: **Classification results obtained after over-sampling the training set.** The figure shows PA for class 1 ( $PA_1$ ) and PA for class 2 ( $PA_2$ ) for different levels of class-imbalance ( $k_1$ ) in the training set containing 100 samples and difference between the classes (left panel:  $\mu_2 = 0$ , middle panel:  $\mu_2 = 0.5$ , right panel:  $\mu_2 = 1$ ). The simulation setting were the same as presented in the table above. See text for more details.

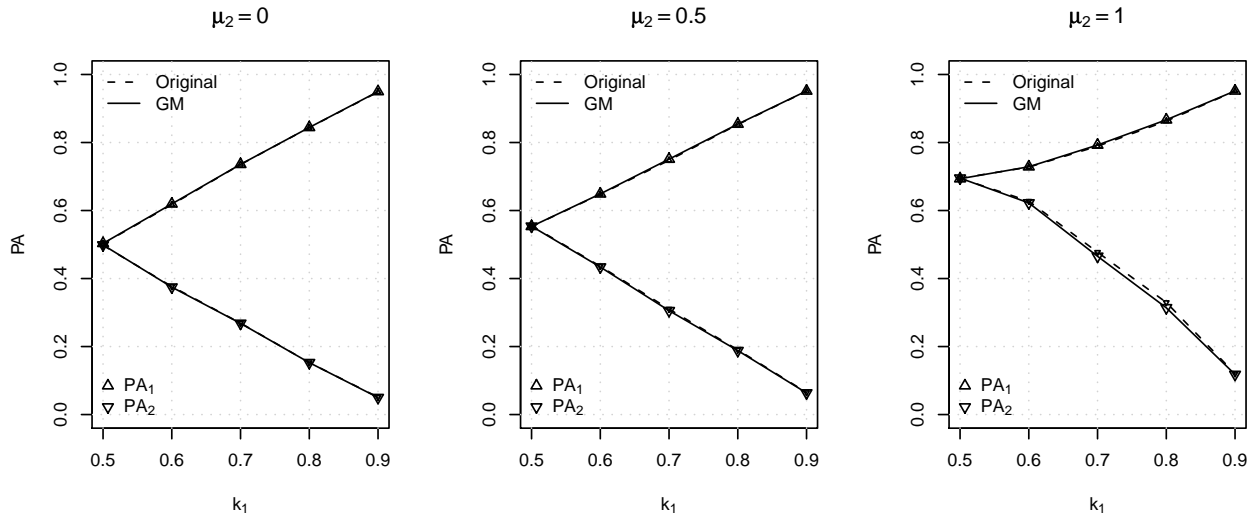

Supplement: 1471-2105-14-64-S8.pdf [file 1471-2105-14-64-S8.pdf]
