# Supplementary material for: Improved shrunken centroid classifiers for high-dimensional class-imbalanced data
Source: PubMed Central journal article supplement (PMC3687811; doi:10.1186/1471-2105-14-64), 2013-02-23
Supplement: 1471-2105-14-64-S1.pdf [file 1471-2105-14-64-S1.pdf]

## Derivation of the expressions for $\lambda_{\max}$

The shrunken centroid for all shrunken centroid based classifiers considered in the paper is defined as

$$\bar{x}_{kj} = \bar{x}_j + \hat{d}_{kj} \cdot m_k \cdot (s_j + s_0). \quad (1)$$

The class-centroid for variable  $j$  for class  $k$  will be equal to the overall centroid when  $\hat{d}_{kj} = 0$ .

### PAM

In PAM  $\hat{d}_{kj}$  is defined as

$$\hat{d}_{kj} = \text{sgn}(d_{kj})(|d_{kj}| - \lambda)_+, \quad (2)$$

so we need to find a solution to

$$\text{sgn}(d_{kj})(|d_{kj}| - \lambda)_+ = 0, \quad (3)$$

which is  $\lambda = |d_{kj}|$ . In order to effectively remove variable  $j$  from the calculation of the discriminant score, we must set the threshold parameter to  $\lambda = |d_{kj}|$ , for each  $k$ . Setting  $\lambda$  to  $\max_k(|d_{kj}|)$  will therefore remove the variable  $j$  from the calculation of the discriminant score. It is then obvious that when  $\lambda = \max_{k,j}(|d_{kj}|)$ , all class-centroids will be shrunken to the overall centroid for each variable.

### ALP-NSC

According to Theorem I in Wang and Zhu (2007) the numerical solutions to  $p$  minimization problems

$$\min_{\tilde{d}_{kj}} \frac{1}{2} \sum_{i=1}^n \sum_{k=1}^K \frac{z_{ik}}{n_k} (\tilde{x}_{ij} - \tilde{d}_{kj})^2 + \lambda \cdot w_j \cdot \max_k(|\tilde{d}_{1j}|, \dots, |\tilde{d}_{Kj}|), \quad (4)$$

$j = 1, \dots, p$ , if there exists an indices set  $C = \{k_1, \dots, k_r\}$ , such that

$$|\hat{d}_{k_1j}| = \dots = |\hat{d}_{k_rj}| > |\hat{d}_{kj}|, \text{ for } k \notin C \quad (5)$$

are

$$\hat{d}_{kj} = \begin{cases} d_{kj} & k \notin C \\ \text{sgn}(d_{kj}) \left( \frac{1}{r} \sum_{s=1}^r |d_{k_sj}| - \frac{\lambda w_j}{r} \right)_+ & k \in C \end{cases}. \quad (6)$$

In order to put all class centroids to the overall centroid for variable  $j$  then  $C = \{1, \dots, K\}$  and the eq. 6 simplifies to

$$\hat{d}_{kj} = \text{sgn}(d_{kj}) \left( \frac{1}{K} \sum_{k=1}^K |d_{kj}| - \frac{\lambda w_j}{K} \right)_+. \quad (7)$$

$\lambda$  that puts  $\hat{d}_{kj}$  to zero for all  $k$  is then a solution to

$$\text{sgn}(d_{kj}) \left( \frac{1}{K} \sum_{k=1}^K |d_{kj}| - \frac{\lambda w_j}{K} \right)_+ = 0, \quad (8)$$

which yields

$$\lambda = \frac{1}{w_j} \sum_{k=1}^K |d_{kj}|. \quad (9)$$

In order to put all class centroids to the overall centroid for each  $j = 1, \dots, p$ , then

$$\lambda_{\max} = \max_j \left( \frac{1}{w_j} \sum_{k=1}^K |d_{kj}| \right). \quad (10)$$

## AHP-NSC

In Wang and Zhu (2007) the authors propose an iterative approach to estimate  $\gamma_j$  and  $\theta_{kj}$  by using

$$\hat{\gamma}_j = I_{(\exists k, \theta_k \neq 0)} \cdot \left( \sum_{k=1}^K \frac{\theta_{kj}}{\sum_{k=1}^K \theta_{kj}^2} d_{kj} - \frac{\lambda_\gamma w_j^\gamma}{\sum_{k=1}^K \theta_{kj}^2} \right)_+ \quad \text{and} \quad (11)$$

$$\hat{\theta}_{kj} = I_{\gamma_j > 0} \text{sgn}(d_{kj}) \left( \frac{|d_{kj}|}{\gamma_j} - \frac{\lambda_\theta w_{kj}^\theta}{\gamma_j^2} \right)_+, \quad (12)$$

and therefore it is necessary only to tune one of the shrinkage parameters, say  $\lambda_\theta$ , and setting  $\lambda_\gamma$  to zero. In this case  $\hat{\gamma}_j^1$  at the first step is

$$\hat{\gamma}_j^1 = I_{(\exists k, \theta_k \neq 0)} \cdot \left( \sum_{k=1}^K \frac{\theta_{kj}}{\sum_{k=1}^K \theta_{kj}^2} d_{kj} \right), \quad (13)$$

which after setting  $\theta_{kj}^1 = \text{sgn}(d_{kj})$  as proposed by the authors, yields to

$$\hat{\gamma}_j^1 = \sum_{k=1}^K \frac{|d_{kj}|}{K}. \quad (14)$$

and the  $\lambda_\theta$  that sets  $\hat{\theta}_{kj}^1$  to zero (and in the second step then also  $\hat{\gamma}_j^2$  to zero) is then a solution to

$$\text{sgn}(d_{kj}) \left( \frac{|d_{kj}|}{\hat{\gamma}_j^1} - \frac{\lambda_\theta w_{kj}^\theta}{\hat{\gamma}_j^{1^2}} \right)_+ = 0. \quad (15)$$

It is then straightforward to show that the solution to the above expression is

$$\lambda_\theta = \frac{1}{w_{kj}^\theta} \frac{1}{K} \sum_{k=1}^K d_{jk}^2. \quad (16)$$

This will then set the centroid for class  $k$  and variable  $j$  to the overall centroid for variable  $j$ . Setting

$$\lambda_\theta = \max_{k,j} \left( \frac{1}{w_{kj}^\theta} \frac{1}{K} \sum_{k=1}^K d_{jk}^2 \right), \quad (17)$$

will set all class centroids to the overall centroid for all variables.
