# Supplementary material for: Improved shrunken centroid classifiers for high-dimensional class-imbalanced data
Source: PubMed Central journal article supplement (PMC3687811; doi:10.1186/1471-2105-14-64), 2013-02-23
Supplement: 1471-2105-14-64-S2.pdf [file 1471-2105-14-64-S2.pdf]

## Classification error and the probability of classification for the example presented in the main text

Let  $\mathbf{x}_i = \{x_{i1}, \dots, x_{ij}, \dots, x_{ip}\}$  denote an observation while  $\mathbf{X}_i = \{X_{i1}, \dots, X_{ij}, \dots, X_{ip}\}$  is used for random vector. For this special example we have  $\bar{X}_{1j}$  and  $\bar{X}_{2j}$  are i.i.d  $N(0, \frac{1}{n_1})$  and  $N(0, \frac{1}{n_2})$ , respectively, and  $Y^*$  is independent of  $\mathbf{X}^*$ . Classification error is then

$$\begin{aligned}
 \text{error} &= P(\mathcal{C}(\mathbf{X}^*) \neq Y^*) \\
 &= 1 - (P(\mathcal{C}(\mathbf{X}^*) = 1)P(Y^* = 1) + P(\mathcal{C}(\mathbf{X}^*) = 2)P(Y^* = 2)) \\
 &= 1 - (P(\mathcal{C}(\mathbf{X}^*) = 1)\pi_1 + (1 - P(\mathcal{C}(\mathbf{X}^*) = 1))(1 - \pi_1)) \\
 &= \pi_1 + P(\mathcal{C}(\mathbf{X}^*) = 1) - 2\pi_1 P(\mathcal{C}(\mathbf{X}^*) = 1),
 \end{aligned} \tag{1}$$

or by analogy

$$\text{error} = \pi_2 + P(\mathcal{C}(\mathbf{X}^*) = 2) - 2\pi_2 P(\mathcal{C}(\mathbf{X}^*) = 2), \tag{2}$$

where  $P(\mathcal{C}(\mathbf{X}^*) = 1)$  and  $P(\mathcal{C}(\mathbf{X}^*) = 2)$  are the probabilities that the classifier  $\mathcal{C}$  will classify  $\mathbf{X}^*$  to class 1 and class 2, respectively. Since we have that the class-variances are known and equal to one in both classes than the pooled variances are also known and equal to one, and the discriminant score for class  $k$  omitting the class prior correction is then simply

$$L_k = \sum_{j=1}^p (X_j^* - \bar{X}_{kj})^2. \tag{3}$$

The probability that the sample is classified in class 1, neglecting the class-prior correction is

$$P(\mathcal{C}(\mathbf{X}^*) = 1) = P(L_1 < L_2) = P\left(\sum_{j=1}^p (X_j^* - \bar{X}_{1j})^2 < \sum_{j=1}^p (X_j^* - \bar{X}_{2j})^2\right). \tag{4}$$

Denote  $X_j = X_j^* - \bar{X}_{1j}$  and  $Z_j = X_j^* - \bar{X}_{2j}$  and note that  $X_j \sim N(0, 1 + \frac{1}{n_1})$  and  $Z_j \sim N(0, 1 + \frac{1}{n_2})$ . Variables  $X = \sum_{j=1}^p X_j^2$  and  $Z = \sum_{j=1}^p Z_j^2$  are correlated and their covariance is

$$\begin{aligned}
 \text{cov}(X, Z) &= \text{cov}\left(\sum_{i=1}^p (X_i)^2, \sum_{j=1}^p (Z_j)^2\right) = \sum_{i=1}^p \sum_{j=1}^p \text{cov}(X_i^2, Z_j^2) = \sum_{j=1}^p \text{cov}(X_j^2, Z_j^2) \\
 &= \sum_{j=1}^p \left(\text{var}(X_j^{*2}) - 2\text{cov}(X_j^{*2}, X_j^* \bar{X}_{2j}) - 2\text{cov}(X_j^{*2}, X_j^* \bar{X}_{1j}) + 4\text{cov}(X_j^* \bar{X}_{1j}, X_j^* \bar{X}_{2j})\right) \\
 &= \sum_{j=1}^p \text{var}(X_j^{*2}) = 2 \sum_{j=1}^p \sigma_j^4 = 2p
 \end{aligned} \tag{5}$$

The variance of  $X$  is

$$\begin{aligned}
 \text{var}(X) &= \text{var}\left(\sum_{j=1}^p X_j^2\right) = \sum_{j=1}^p \text{var}(X_j^2) \\
 &= \sum_{j=1}^p \left(E(X_j^2) - E(X_j^2)^2\right) = 2 \sum_{j=1}^p \left(1 + \frac{1}{n_1}\right)^2 = 2p\left(1 + \frac{1}{n_1}\right)^2,
 \end{aligned} \tag{6}$$

and the variance of  $Z$  is then by analogy,  $\text{var}(Z) = 2p(1 + \frac{1}{n_2})^2$ . The correlation between  $X$  and  $Z$  is then

$$\rho = \frac{\text{cov}(X, Z)}{\sqrt{\text{var}(X)\text{var}(Z)}} = \frac{2p}{2p(1 + \frac{1}{n_1})(1 + \frac{1}{n_2})} = \frac{1}{(1 + \frac{1}{n_1})(1 + \frac{1}{n_2})}. \quad (7)$$

For  $p = 1$  we have

$$\begin{aligned} P(\mathcal{C}(\mathbf{X}^*) = 1) &= P\left((X^* - \bar{X}_1)^2 < (X^* - \bar{X}_2)^2\right) \\ &= P\left(|X^* - \bar{X}_1| < |X^* - \bar{X}_2|\right) \\ &= \frac{c}{2\pi} \int \int_{|X| < |Z|} e^{-\frac{c^2}{2}(x^2 \frac{1+n_2}{n_2} + z^2 \frac{1+n_1}{n_1} - 2xz)} dz dx, \end{aligned} \quad (8)$$

where  $c = \sqrt{\frac{n_1 n_2}{1+n_1+n_2}}$ . The above integral can be solved analytically which yields

$$\begin{aligned} P(\mathcal{C}(\mathbf{X}^*) = 1) &= 1 - \frac{1}{\pi} \left( \arctan\left(\frac{1}{n_1} \sqrt{\frac{n_1 n_2}{1+n_1+n_2}}\right) + \right. \\ &\quad \left. + \arctan\left(\frac{1+2n_1}{n_1} \sqrt{\frac{n_1 n_2}{1+n_1+n_2}}\right) \right). \end{aligned} \quad (9)$$

For  $p > 1$  we can write

$$\begin{aligned} P(\mathcal{C}(\mathbf{X}^*) = 1) &= P\left(\sum_{j=1}^p X_j^2 < \sum_{j=1}^p Z_j^2\right) \\ &= P\left(\left(1 + \frac{1}{n_1}\right) \sum_{j=1}^p \frac{X_j^2}{1 + \frac{1}{n_1}} < \left(1 + \frac{1}{n_2}\right) \sum_{j=1}^p \frac{Z_j^2}{1 + \frac{1}{n_2}}\right), \end{aligned} \quad (10)$$

where  $U_1 = \sum_{j=1}^p \frac{X_j^2}{1 + \frac{1}{n_1}} \sim \chi_p^2$  and  $U_2 = \sum_{j=1}^p \frac{Z_j^2}{1 + \frac{1}{n_2}} \sim \chi_p^2$ . Joarder (2007) derived the probability density function (p.d.f.) of two correlated chi-square variables each with  $p$  degrees of freedom,

$$f(u_1, u_2) = \frac{2^{-(p+1)} (u_1 u_2)^{\frac{p-2}{2}} e^{-\frac{(u_1+u_2)}{2(1-\rho^2)}}}{\sqrt{\pi} \Gamma(\frac{p}{2}) (1-\rho^2)^{\frac{p}{2}}} \sum_{k=0}^{\infty} (1+(-1)^k) \left(\frac{\rho \sqrt{u_1 u_2}}{1-\rho^2}\right)^k \frac{\Gamma(\frac{k+1}{2})}{k! \Gamma(\frac{k+p}{2})} \quad (11)$$

and we have,

$$P(\mathcal{C}(\mathbf{X}^*) = 1) = \int \int_{U_1 < \frac{1+\frac{1}{n_2}}{1+\frac{1}{n_1}} U_2} f(u_1, u_2) du_1 du_2. \quad (12)$$

The above integral can not be solved analytically but we can use numerical methods to solve it for our special case.

For a large  $p$  we can write

$$\begin{aligned}
P(\mathcal{C}(\mathbf{X}^*) = 1) &= P\left(\left(1 + \frac{1}{n_1}\right)U_1 < \left(1 + \frac{1}{n_2}\right)U_2\right) \\
&= P\left(\sqrt{\left(1 + \frac{1}{n_1}\right)}\sqrt{2U_1} < \sqrt{\left(1 + \frac{1}{n_2}\right)}\sqrt{2U_2}\right), \tag{13}
\end{aligned}$$

where  $\tilde{X} = \sqrt{2U_1} \sim N(\sqrt{2p-1}, 1)$  and  $\tilde{Z} = \sqrt{2U_2} \sim N(\sqrt{2p-1}, 1)$ , for a large  $p$ . The probability of classification in class 1 is then

$$P(\mathcal{C}(\mathbf{X}^*) = 1) = \int \int_{\tilde{X} < \sqrt{\frac{1+\frac{1}{n_2}}{1+\frac{1}{n_1}}}\tilde{Z}} f(\tilde{x}, \tilde{z}) d\tilde{x} d\tilde{z}, \tag{14}$$

where  $f(\tilde{x}, \tilde{z})$  is a p.d.f of two correlated normally distributed random variables  $\tilde{X}$  and  $\tilde{Z}$ . We can use numerical integration to solve the above integral for our special example.

Note that  $cor(\sqrt{2U_1}, \sqrt{2U_2}) = cor(U_1, U_2) = cor(X, Z)$ , since the correlation coefficient is invariant under monotonic increasing transformation.
