# Supplementary material for: Improved shrunken centroid classifiers for high-dimensional class-imbalanced data
Source: PubMed Central journal article supplement (PMC3687811; doi:10.1186/1471-2105-14-64), 2013-02-23
Supplement: 1471-2105-14-64-S4.pdf [file 1471-2105-14-64-S4.pdf]

Table 1: **Classification results under the null hypothesis for a large number of variables ( $p = 10000$ ) and the correlated scenario ( $\rho = 0.8$ ).** The table shows optimal threshold parameter ( $\lambda^*$ ), number of active irrelevant variables ( $\#$  non-info), PA for class 1 ( $PA_1$ ) and PA for class 2 ( $PA_2$ ), g-means and AUC for different levels of class-imbalance ( $k_1$ ) in the training set containing 100 samples. There was no difference between the classes ( $\mu_2 = 0$ ).

| $k_1$  | Method | $\lambda^*$    | # non-info           | $PA_1$               | $PA_2$         | g-means        | AUC            |               |
|--------|--------|----------------|----------------------|----------------------|----------------|----------------|----------------|---------------|
| 0.5    | PAM    | 1.25<br>(0.66) | 1714.84<br>(3024.51) | 0.5<br>(0.04)        | 0.5<br>(0.04)  | 0.5<br>(0.02)  | 0.5<br>(0.02)  |               |
|        | GM-PAM | 1.21<br>(0.67) | 1894.69<br>(3175.92) | 0.5<br>(0.04)        | 0.5<br>(0.04)  | 0.5<br>(0.02)  | 0.5<br>(0.02)  |               |
|        | ALP    | 3.19<br>(2.46) | 2182.79<br>(3511.75) | 0.5<br>(0.05)        | 0.5<br>(0.05)  | 0.5<br>(0.02)  | 0.5<br>(0.02)  |               |
|        | GM-ALP | 3.06<br>(2.43) | 2263.77<br>(3544.79) | 0.5<br>(0.05)        | 0.5<br>(0.05)  | 0.5<br>(0.02)  | 0.5<br>(0.02)  |               |
|        | AHP    | 2.73<br>(2.3)  | 1833.34<br>(3455.85) | 0.5<br>(0.04)        | 0.5<br>(0.04)  | 0.5<br>(0.02)  | 0.5<br>(0.02)  |               |
|        | GM-AHP | 2.53<br>(2.27) | 1958.54<br>(3518.79) | 0.5<br>(0.04)        | 0.5<br>(0.04)  | 0.5<br>(0.02)  | 0.5<br>(0.02)  |               |
|        | 0.6    | PAM            | 1.11<br>(0.69)       | 2317.71<br>(3512.03) | 0.53<br>(0.05) | 0.47<br>(0.06) | 0.5<br>(0.02)  | 0.5<br>(0.01) |
|        |        | GM-PAM         | 1.18<br>(0.64)       | 1820.87<br>(3026.06) | 0.52<br>(0.05) | 0.48<br>(0.05) | 0.5<br>(0.02)  | 0.5<br>(0.01) |
| ALP    |        | 2.75<br>(2.54) | 2770.38<br>(3779.34) | 0.54<br>(0.06)       | 0.46<br>(0.06) | 0.5<br>(0.02)  | 0.5<br>(0.02)  |               |
| GM-ALP |        | 3.06<br>(2.42) | 1987.98<br>(3190.02) | 0.53<br>(0.05)       | 0.47<br>(0.05) | 0.5<br>(0.02)  | 0.5<br>(0.02)  |               |
| AHP    |        | 2.58<br>(2.39) | 2129.23<br>(3685.05) | 0.56<br>(0.05)       | 0.44<br>(0.05) | 0.49<br>(0.02) | 0.5<br>(0.02)  |               |
| GM-AHP |        | 2.73<br>(2.34) | 1770.8<br>(3423.47)  | 0.56<br>(0.05)       | 0.44<br>(0.05) | 0.49<br>(0.02) | 0.5<br>(0.02)  |               |
| 0.7    |        | PAM            | 0.59<br>(0.71)       | 5481.04<br>(4198.91) | 0.62<br>(0.09) | 0.38<br>(0.09) | 0.48<br>(0.03) | 0.5<br>(0.02) |
|        |        | GM-PAM         | 1.25<br>(0.57)       | 1225.24<br>(2230.39) | 0.54<br>(0.06) | 0.46<br>(0.06) | 0.49<br>(0.02) | 0.5<br>(0.02) |
|        | ALP    | 1.49<br>(2.18) | 5080.11<br>(4264.38) | 0.63<br>(0.09)       | 0.37<br>(0.09) | 0.47<br>(0.03) | 0.5<br>(0.02)  |               |
|        | GM-ALP | 3.21<br>(2.34) | 1584.57<br>(2782.6)  | 0.56<br>(0.08)       | 0.44<br>(0.08) | 0.49<br>(0.02) | 0.5<br>(0.02)  |               |
|        | AHP    | 1.8<br>(2.07)  | 2930.47<br>(4052.71) | 0.64<br>(0.07)       | 0.35<br>(0.07) | 0.47<br>(0.03) | 0.5<br>(0.02)  |               |
|        | GM-AHP | 3.01<br>(2.19) | 1226.88<br>(2838.52) | 0.61<br>(0.07)       | 0.39<br>(0.07) | 0.48<br>(0.02) | 0.5<br>(0.02)  |               |
|        | 0.8    | PAM            | 0.06<br>(0.21)       | 9230.38<br>(1655.79) | 0.8<br>(0.06)  | 0.2<br>(0.06)  | 0.39<br>(0.04) | 0.5<br>(0.02) |
|        |        | GM-PAM         | 1.37<br>(0.52)       | 762.37<br>(1626.6)   | 0.55<br>(0.08) | 0.45<br>(0.08) | 0.49<br>(0.02) | 0.5<br>(0.02) |
| ALP    |        | 0.16<br>(0.66) | 8866.96<br>(2627.17) | 0.8<br>(0.06)        | 0.2<br>(0.06)  | 0.39<br>(0.04) | 0.5<br>(0.02)  |               |
| GM-ALP |        | 3.78<br>(2.15) | 776.08<br>(1792.69)  | 0.57<br>(0.09)       | 0.43<br>(0.09) | 0.48<br>(0.03) | 0.5<br>(0.02)  |               |
| AHP    |        | 0.74<br>(1.61) | 5453.21<br>(4413.4)  | 0.78<br>(0.07)       | 0.22<br>(0.07) | 0.41<br>(0.04) | 0.5<br>(0.02)  |               |
| GM-AHP |        | 3.71<br>(2.13) | 477.33<br>(1703.37)  | 0.65<br>(0.08)       | 0.35<br>(0.08) | 0.47<br>(0.03) | 0.5<br>(0.02)  |               |
| 0.9    |        | PAM            | 0.02<br>(0.05)       | 9616.19<br>(725.82)  | 0.94<br>(0.02) | 0.06<br>(0.02) | 0.23<br>(0.04) | 0.5<br>(0.02) |
|        |        | GM-PAM         | 1.4<br>(0.45)        | 524.32<br>(1163.06)  | 0.56<br>(0.1)  | 0.44<br>(0.09) | 0.49<br>(0.03) | 0.5<br>(0.01) |
|        | ALP    | 0.02<br>(0.08) | 9642.75<br>(1350.17) | 0.95<br>(0.02)       | 0.05<br>(0.02) | 0.22<br>(0.04) | 0.5<br>(0.02)  |               |
|        | GM-ALP | 3.93<br>(2.01) | 495.47<br>(1234.67)  | 0.6<br>(0.11)        | 0.4<br>(0.11)  | 0.48<br>(0.05) | 0.5<br>(0.02)  |               |
|        | AHP    | 0.13<br>(0.23) | 7091.47<br>(3927.21) | 0.94<br>(0.02)       | 0.06<br>(0.03) | 0.23<br>(0.04) | 0.5<br>(0.02)  |               |
|        | GM-AHP | 4.12<br>(1.94) | 263.35<br>(1180.74)  | 0.72<br>(0.11)       | 0.28<br>(0.11) | 0.43<br>(0.07) | 0.5<br>(0.02)  |               |

Table 2: **Classification results under the alternative hypothesis for a large number of variables ( $p = 10000$ ) and the correlated scenario ( $\rho = 0.8$ ).** The table shows optimal threshold parameter ( $\lambda^*$ ), number of active relevant variables (# info), number of active irrelevant variables (# non-info), PA for class 1 ( $PA_1$ ) and PA for class 2 ( $PA_2$ ), g-means and AUC for different levels of class-imbalance ( $k_1$ ) in the training set containing 100 samples. The differences between the classes were small ( $\mu_2 = 0.5$ ; 100 variables were differentially expressed).

| $k_1$ | Method | $\lambda^*$ | # info  | # non-info | $PA_1$ | $PA_2$ | g-means | AUC    |
|-------|--------|-------------|---------|------------|--------|--------|---------|--------|
| 0.5   | PAM    | 1.34        | 43.04   | 1438.42    | 0.55   | 0.55   | 0.55    | 0.57   |
|       |        | (0.7)       | (43.71) | (2719.85)  | (0.06) | (0.06) | (0.05)  | (0.06) |
|       | GM-PAM | 1.28        | 46.48   | 1601.15    | 0.55   | 0.55   | 0.55    | 0.57   |
|       |        | (0.71)      | (44.21) | (2861.99)  | (0.06) | (0.06) | (0.05)  | (0.06) |
|       | ALP    | 3.73        | 53.07   | 1485.14    | 0.56   | 0.56   | 0.56    | 0.57   |
|       |        | (2.88)      | (42.37) | (2773.9)   | (0.06) | (0.06) | (0.05)  | (0.05) |
|       | GM-ALP | 3.57        | 55.12   | 1640.82    | 0.56   | 0.56   | 0.55    | 0.57   |
|       |        | (2.84)      | (42.02) | (2940.85)  | (0.06) | (0.06) | (0.04)  | (0.05) |
|       | AHP    | 3.75        | 42.01   | 1111.68    | 0.55   | 0.55   | 0.55    | 0.57   |
|       |        | (3.3)       | (40.93) | (2673.99)  | (0.06) | (0.06) | (0.05)  | (0.05) |
|       | GM-AHP | 3.58        | 44.02   | 1209.46    | 0.55   | 0.55   | 0.55    | 0.57   |
|       |        | (3.27)      | (41.21) | (2782.07)  | (0.06) | (0.06) | (0.04)  | (0.05) |
| 0.6   | PAM    | 1.2         | 50.96   | 2043.56    | 0.57   | 0.53   | 0.55    | 0.57   |
|       |        | (0.74)      | (44.64) | (3225.07)  | (0.06) | (0.08) | (0.05)  | (0.06) |
|       | GM-PAM | 1.26        | 47.86   | 1569.16    | 0.56   | 0.54   | 0.55    | 0.57   |
|       |        | (0.69)      | (44)    | (2782.5)   | (0.06) | (0.08) | (0.05)  | (0.06) |
|       | ALP    | 3.43        | 57.84   | 2040.27    | 0.58   | 0.53   | 0.55    | 0.57   |
|       |        | (3.04)      | (42.35) | (3362.6)   | (0.06) | (0.08) | (0.05)  | (0.05) |
|       | GM-ALP | 3.57        | 54.93   | 1629.5     | 0.57   | 0.53   | 0.55    | 0.57   |
|       |        | (2.9)       | (42.79) | (2986.19)  | (0.06) | (0.08) | (0.05)  | (0.05) |
|       | AHP    | 3.35        | 46.04   | 1407.81    | 0.59   | 0.51   | 0.55    | 0.57   |
|       |        | (3.3)       | (41.47) | (3003.61)  | (0.05) | (0.08) | (0.05)  | (0.05) |
|       | GM-AHP | 3.42        | 44.3    | 1200.94    | 0.59   | 0.51   | 0.55    | 0.57   |
|       |        | (3.14)      | (41.1)  | (2782.2)   | (0.05) | (0.08) | (0.05)  | (0.05) |
| 0.7   | PAM    | 0.77        | 68.79   | 4385.98    | 0.63   | 0.45   | 0.52    | 0.56   |
|       |        | (0.78)      | (42.59) | (4166.54)  | (0.09) | (0.12) | (0.05)  | (0.05) |
|       | GM-PAM | 1.33        | 39.13   | 1045.2     | 0.56   | 0.52   | 0.54    | 0.56   |
|       |        | (0.6)       | (42.62) | (2132.2)   | (0.07) | (0.09) | (0.05)  | (0.06) |
|       | ALP    | 1.92        | 73.09   | 4191.88    | 0.64   | 0.44   | 0.52    | 0.55   |
|       |        | (2.44)      | (39.42) | (4228)     | (0.08) | (0.12) | (0.05)  | (0.05) |
|       | GM-ALP | 3.66        | 44.77   | 1188.64    | 0.59   | 0.5    | 0.54    | 0.56   |
|       |        | (2.61)      | (43.02) | (2306.65)  | (0.08) | (0.1)  | (0.05)  | (0.05) |
|       | AHP    | 2.15        | 57.85   | 2624.07    | 0.66   | 0.42   | 0.52    | 0.55   |
|       |        | (2.67)      | (41.75) | (3929.2)   | (0.06) | (0.1)  | (0.05)  | (0.05) |
|       | GM-AHP | 3.62        | 33.71   | 819.84     | 0.63   | 0.46   | 0.53    | 0.56   |
|       |        | (2.8)       | (38.32) | (2256.46)  | (0.07) | (0.1)  | (0.05)  | (0.06) |
| 0.8   | PAM    | 0.07        | 98.28   | 9028.45    | 0.81   | 0.23   | 0.42    | 0.54   |
|       |        | (0.2)       | (9.81)  | (1840.1)   | (0.06) | (0.07) | (0.04)  | (0.03) |
|       | GM-PAM | 1.34        | 31.84   | 839.52     | 0.56   | 0.5    | 0.52    | 0.55   |
|       |        | (0.54)      | (41.02) | (1744.37)  | (0.08) | (0.1)  | (0.05)  | (0.06) |
|       | ALP    | 0.19        | 95.92   | 8322.8     | 0.81   | 0.23   | 0.42    | 0.54   |
|       |        | (0.64)      | (17.23) | (2953.94)  | (0.06) | (0.08) | (0.05)  | (0.03) |
|       | GM-ALP | 3.64        | 36.11   | 817.92     | 0.59   | 0.47   | 0.52    | 0.54   |
|       |        | (2.26)      | (41.69) | (1757.85)  | (0.09) | (0.11) | (0.05)  | (0.05) |
|       | AHP    | 0.85        | 79      | 4987.73    | 0.79   | 0.26   | 0.45    | 0.55   |
|       |        | (1.84)      | (34.11) | (4442.68)  | (0.07) | (0.1)  | (0.06)  | (0.04) |
|       | GM-AHP | 3.94        | 24.07   | 493.42     | 0.67   | 0.39   | 0.51    | 0.55   |
|       |        | (2.52)      | (34.84) | (1727.62)  | (0.08) | (0.11) | (0.06)  | (0.06) |
| 0.9   | PAM    | 0.03        | 98.99   | 9463.69    | 0.94   | 0.07   | 0.25    | 0.53   |
|       |        | (0.05)      | (5.59)  | (809.28)   | (0.02) | (0.03) | (0.05)  | (0.02) |
|       | GM-PAM | 1.37        | 20.16   | 629.3      | 0.57   | 0.45   | 0.5     | 0.52   |
|       |        | (0.48)      | (35.45) | (1339.82)  | (0.1)  | (0.11) | (0.05)  | (0.05) |
|       | ALP    | 0.02        | 98.98   | 9497.97    | 0.95   | 0.06   | 0.24    | 0.52   |
|       |        | (0.07)      | (7.41)  | (1381.33)  | (0.02) | (0.02) | (0.04)  | (0.02) |
|       | GM-ALP | 3.79        | 20.71   | 507.53     | 0.61   | 0.42   | 0.49    | 0.52   |
|       |        | (2.07)      | (34.08) | (1129.18)  | (0.11) | (0.12) | (0.06)  | (0.04) |
|       | AHP    | 0.15        | 83.42   | 6742.98    | 0.94   | 0.07   | 0.26    | 0.53   |
|       |        | (0.25)      | (31.57) | (3998.91)  | (0.03) | (0.03) | (0.05)  | (0.03) |
|       | GM-AHP | 4.17        | 11.25   | 339.6      | 0.73   | 0.3    | 0.45    | 0.52   |
|       |        | (2.05)      | (25.83) | (1418.47)  | (0.11) | (0.12) | (0.08)  | (0.05) |

Table 3: **Classification results under the alternative hypothesis for a large number of variables ( $p = 10000$ ) and the correlated scenario ( $\rho = 0.8$ ).** The table shows optimal threshold parameter ( $\lambda^*$ ), number of active relevant variables ( $\#$  info), number of active irrelevant variables ( $\#$  non-info), PA for class 1 ( $PA_1$ ) and PA for class 2 ( $PA_2$ ), g-means and AUC for different levels of class-imbalance ( $k_1$ ) in the training set containing 100 samples. The differences between the classes were moderate ( $\mu_2 = 1$ ; 100 variables were differentially expressed).

| $k_1$ | Method | $\lambda^*$ | $\#$ info | $\#$ non-info | $PA_1$ | $PA_2$ | g-means | AUC    |
|-------|--------|-------------|-----------|---------------|--------|--------|---------|--------|
| 0.5   | PAM    | 2.16        | 52.63     | 403.88        | 0.7    | 0.7    | 0.7     | 0.77   |
|       |        | (0.93)      | (42.1)    | (1303.07)     | (0.05) | (0.05) | (0.03)  | (0.04) |
|       | GM-PAM | 2.09        | 56.11     | 449.75        | 0.7    | 0.7    | 0.7     | 0.77   |
|       |        | (0.94)      | (42.3)    | (1379.52)     | (0.05) | (0.05) | (0.03)  | (0.04) |
|       | ALP    | 10.61       | 60.5      | 223.52        | 0.71   | 0.7    | 0.7     | 0.72   |
|       |        | (6.74)      | (34.86)   | (819.07)      | (0.04) | (0.04) | (0.02)  | (0.03) |
|       | GM-ALP | 10.11       | 63.59     | 283.23        | 0.71   | 0.7    | 0.7     | 0.72   |
|       |        | (6.82)      | (34.79)   | (967.82)      | (0.04) | (0.04) | (0.02)  | (0.03) |
|       | AHP    | 14.94       | 56.54     | 190.5         | 0.7    | 0.7    | 0.7     | 0.73   |
|       |        | (10.98)     | (33.92)   | (1190.91)     | (0.05) | (0.05) | (0.03)  | (0.03) |
|       | GM-AHP | 14.06       | 60.43     | 221.09        | 0.7    | 0.7    | 0.7     | 0.73   |
|       |        | (10.95)     | (34)      | (1273.27)     | (0.05) | (0.05) | (0.03)  | (0.03) |
| 0.6   | PAM    | 1.97        | 59.15     | 493.12        | 0.68   | 0.72   | 0.7     | 0.77   |
|       |        | (0.93)      | (43.52)   | (1380.39)     | (0.04) | (0.06) | (0.03)  | (0.03) |
|       | GM-PAM | 1.99        | 59.21     | 408.9         | 0.68   | 0.72   | 0.7     | 0.77   |
|       |        | (0.9)       | (42.94)   | (1160.9)      | (0.04) | (0.05) | (0.03)  | (0.03) |
|       | ALP    | 8.28        | 67.95     | 338.95        | 0.69   | 0.71   | 0.7     | 0.72   |
|       |        | (6.01)      | (35.86)   | (1273.09)     | (0.05) | (0.06) | (0.03)  | (0.03) |
|       | GM-ALP | 8.16        | 69.29     | 244.88        | 0.69   | 0.71   | 0.7     | 0.72   |
|       |        | (5.92)      | (35.21)   | (812.89)      | (0.04) | (0.05) | (0.03)  | (0.03) |
|       | AHP    | 13.59       | 57.42     | 214.72        | 0.71   | 0.7    | 0.7     | 0.74   |
|       |        | (10.68)     | (33.67)   | (1272.28)     | (0.04) | (0.05) | (0.03)  | (0.03) |
|       | GM-AHP | 13.32       | 59.31     | 86.69         | 0.71   | 0.7    | 0.7     | 0.74   |
|       |        | (10.4)      | (33.07)   | (653.92)      | (0.04) | (0.05) | (0.03)  | (0.03) |
| 0.7   | PAM    | 1.36        | 76.46     | 1608.89       | 0.67   | 0.68   | 0.67    | 0.74   |
|       |        | (0.89)      | (38.92)   | (2804.46)     | (0.06) | (0.12) | (0.05)  | (0.06) |
|       | GM-PAM | 1.76        | 64.3      | 480.41        | 0.65   | 0.73   | 0.69    | 0.76   |
|       |        | (0.82)      | (42.71)   | (1184.06)     | (0.05) | (0.08) | (0.03)  | (0.04) |
|       | ALP    | 4.79        | 83.59     | 1364.82       | 0.69   | 0.67   | 0.68    | 0.72   |
|       |        | (4.69)      | (30.65)   | (2783.01)     | (0.06) | (0.12) | (0.05)  | (0.05) |
|       | GM-ALP | 6.77        | 73.61     | 322.1         | 0.67   | 0.72   | 0.69    | 0.72   |
|       |        | (4.91)      | (35.34)   | (1054.82)     | (0.05) | (0.07) | (0.03)  | (0.04) |
|       | AHP    | 11.73       | 59.2      | 496.52        | 0.73   | 0.66   | 0.69    | 0.73   |
|       |        | (10.81)     | (36.69)   | (1936.22)     | (0.04) | (0.09) | (0.05)  | (0.04) |
|       | GM-AHP | 12.2        | 56.41     | 64.86         | 0.72   | 0.68   | 0.7     | 0.74   |
|       |        | (10.1)      | (34.89)   | (420.45)      | (0.04) | (0.06) | (0.03)  | (0.03) |
| 0.8   | PAM    | 0.26        | 98.95     | 7138.77       | 0.8    | 0.39   | 0.54    | 0.66   |
|       |        | (0.41)      | (8.87)    | (3491.76)     | (0.08) | (0.17) | (0.09)  | (0.06) |
|       | GM-PAM | 1.53        | 66.76     | 496.15        | 0.64   | 0.73   | 0.68    | 0.75   |
|       |        | (0.66)      | (41.32)   | (1068.22)     | (0.07) | (0.1)  | (0.05)  | (0.06) |
|       | ALP    | 0.82        | 99.66     | 6115.45       | 0.8    | 0.41   | 0.55    | 0.66   |
|       |        | (1.43)      | (4.75)    | (4264.64)     | (0.08) | (0.19) | (0.1)   | (0.06) |
|       | GM-ALP | 4.96        | 74.6      | 334.81        | 0.66   | 0.71   | 0.68    | 0.72   |
|       |        | (3.48)      | (35.67)   | (767.47)      | (0.07) | (0.1)  | (0.05)  | (0.05) |
|       | AHP    | 5.06        | 78.41     | 2910.9        | 0.79   | 0.49   | 0.6     | 0.69   |
|       |        | (7.98)      | (33.83)   | (4240.07)     | (0.06) | (0.18) | (0.1)   | (0.06) |
|       | GM-AHP | 8.69        | 52.01     | 94.03         | 0.73   | 0.65   | 0.68    | 0.73   |
|       |        | (7.08)      | (34.99)   | (638.55)      | (0.05) | (0.1)  | (0.05)  | (0.05) |
