# Supplementary material for: Improved shrunken centroid classifiers for high-dimensional class-imbalanced data
Source: PubMed Central journal article supplement (PMC3687811; doi:10.1186/1471-2105-14-64), 2013-02-23

**PAM**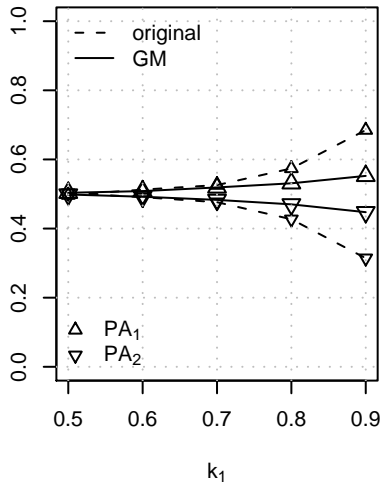**ALP**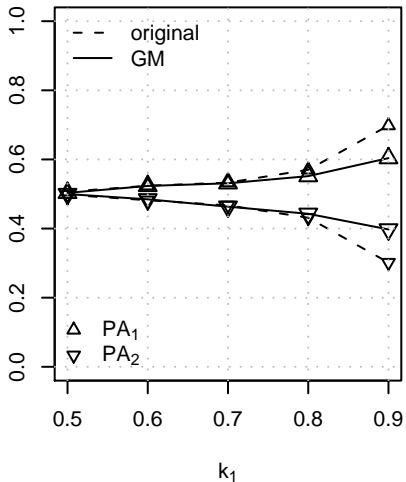**AHP**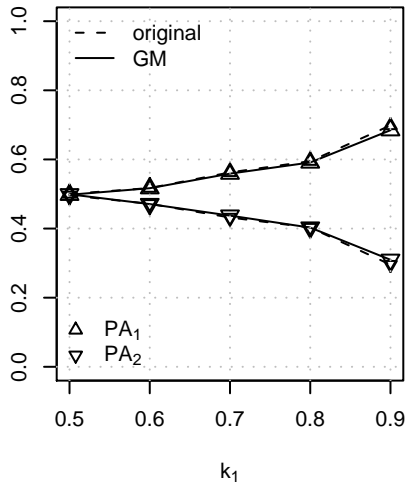

Supplement: 1471-2105-14-64-S5.pdf [file 1471-2105-14-64-S5.pdf]
