# Supplementary material for: Improved shrunken centroid classifiers for high-dimensional class-imbalanced data
Source: PubMed Central journal article supplement (PMC3687811; doi:10.1186/1471-2105-14-64), 2013-02-23
Supplement: 1471-2105-14-64-S7.pdf [file 1471-2105-14-64-S7.pdf]

Table 1: **Classification results under the null hypothesis for a small number of variables ( $p = 1000$ ) and the correlated scenario ( $\rho = 0.8$ ).** The table shows optimal threshold parameter ( $\lambda^*$ ), number of active irrelevant variables ( $\#$  non-info), PA for class 1 ( $PA_1$ ) and PA for class 2 ( $PA_2$ ), g-means and AUC for different levels of class-imbalance ( $k_1$ ) in the training set containing 100 samples. There was no difference between the classes ( $\mu_2 = 0$ ).

| $k_1$ | Method | $\lambda^*$ | # non-info | $PA_1$ | $PA_2$ | g-means | AUC    |
|-------|--------|-------------|------------|--------|--------|---------|--------|
| 0.5   | PAM    | 0.97        | 208.71     | 0.5    | 0.5    | 0.5     | 0.5    |
|       |        | (0.52)      | (7.34)     | (0.04) | (0.04) | (0.02)  | (0.02) |
|       | GM-PAM | 0.89        | 5.1        | 0.5    | 0.5    | 0.5     | 0.5    |
|       |        | (0.54)      | (7.82)     | (0.04) | (0.04) | (0.02)  | (0.02) |
|       | ALP    | 2.06        | 257.16     | 0.51   | 0.5    | 0.5     | 0.5    |
|       |        | (1.61)      | (384.11)   | (0.04) | (0.04) | (0.01)  | (0.02) |
|       | GM-ALP | 1.86        | 5.64       | 0.5    | 0.5    | 0.5     | 0.5    |
|       |        | (1.52)      | (8.57)     | (0.04) | (0.05) | (0.01)  | (0.02) |
|       | AHP    | 1.62        | 150.2      | 0.5    | 0.5    | 0.5     | 0.5    |
|       |        | (1.38)      | (292.24)   | (0.04) | (0.05) | (0.02)  | (0.02) |
|       | GM-AHP | 1.47        | 25.3       | 0.5    | 0.5    | 0.5     | 0.5    |
|       |        | (1.33)      | (40.05)    | (0.04) | (0.05) | (0.02)  | (0.02) |
| 0.6   | PAM    | 0.92        | 246.51     | 0.51   | 0.49   | 0.5     | 0.5    |
|       |        | (0.54)      | (7.58)     | (0.04) | (0.04) | (0.02)  | (0.02) |
|       | GM-PAM | 0.97        | 3.95       | 0.51   | 0.49   | 0.5     | 0.5    |
|       |        | (0.52)      | (7.01)     | (0.04) | (0.04) | (0.02)  | (0.02) |
|       | ALP    | 1.69        | 305.12     | 0.52   | 0.48   | 0.5     | 0.5    |
|       |        | (1.65)      | (366.91)   | (0.05) | (0.04) | (0.02)  | (0.02) |
|       | GM-ALP | 1.64        | 6.56       | 0.52   | 0.48   | 0.5     | 0.5    |
|       |        | (1.64)      | (8.11)     | (0.05) | (0.05) | (0.02)  | (0.02) |
|       | AHP    | 1.54        | 188.94     | 0.52   | 0.47   | 0.49    | 0.49   |
|       |        | (1.15)      | (348.92)   | (0.05) | (0.04) | (0.01)  | (0.02) |
|       | GM-AHP | 1.55        | 17.9       | 0.52   | 0.47   | 0.49    | 0.49   |
|       |        | (1.13)      | (36.04)    | (0.05) | (0.04) | (0.01)  | (0.02) |
| 0.7   | PAM    | 0.86        | 286.96     | 0.53   | 0.48   | 0.5     | 0.5    |
|       |        | (0.57)      | (8.4)      | (0.05) | (0.05) | (0.02)  | (0.02) |
|       | GM-PAM | 0.94        | 4.43       | 0.52   | 0.48   | 0.5     | 0.5    |
|       |        | (0.52)      | (7.57)     | (0.05) | (0.05) | (0.02)  | (0.02) |
|       | ALP    | 1.84        | 240.06     | 0.53   | 0.47   | 0.5     | 0.5    |
|       |        | (1.41)      | (336.46)   | (0.05) | (0.05) | (0.01)  | (0.02) |
|       | GM-ALP | 1.98        | 3.56       | 0.53   | 0.46   | 0.49    | 0.49   |
|       |        | (1.46)      | (6.37)     | (0.05) | (0.05) | (0.02)  | (0.02) |
|       | AHP    | 1.32        | 256.34     | 0.56   | 0.43   | 0.49    | 0.5    |
|       |        | (1.33)      | (386.09)   | (0.05) | (0.05) | (0.02)  | (0.02) |
|       | GM-AHP | 1.18        | 27.76      | 0.56   | 0.44   | 0.49    | 0.5    |
|       |        | (1.15)      | (40.11)    | (0.05) | (0.05) | (0.02)  | (0.02) |
| 0.8   | PAM    | 0.47        | 572.72     | 0.57   | 0.43   | 0.49    | 0.5    |
|       |        | (0.55)      | (8.87)     | (0.07) | (0.07) | (0.02)  | (0.02) |
|       | GM-PAM | 0.96        | 4.13       | 0.53   | 0.47   | 0.5     | 0.5    |
|       |        | (0.5)       | (7.18)     | (0.06) | (0.06) | (0.02)  | (0.02) |
|       | ALP    | 1.22        | 465.28     | 0.57   | 0.43   | 0.49    | 0.5    |
|       |        | (1.5)       | (428.56)   | (0.05) | (0.06) | (0.02)  | (0.02) |
|       | GM-ALP | 1.64        | 5.44       | 0.55   | 0.44   | 0.49    | 0.5    |
|       |        | (1.56)      | (8.27)     | (0.05) | (0.04) | (0.02)  | (0.02) |
|       | AHP    | 1.31        | 294.78     | 0.6    | 0.4    | 0.49    | 0.5    |
|       |        | (1.39)      | (432.51)   | (0.06) | (0.05) | (0.02)  | (0.02) |
|       | GM-AHP | 1.64        | 22.58      | 0.59   | 0.4    | 0.49    | 0.5    |
|       |        | (1.45)      | (39.77)    | (0.05) | (0.05) | (0.02)  | (0.01) |
| 0.9   | PAM    | 0.05        | 926.09     | 0.68   | 0.31   | 0.46    | 0.5    |
|       |        | (0.16)      | (4)        | (0.06) | (0.05) | (0.02)  | (0.02) |
|       | GM-PAM | 0.96        | 3.94       | 0.55   | 0.45   | 0.49    | 0.5    |
|       |        | (0.5)       | (7.19)     | (0.08) | (0.08) | (0.02)  | (0.02) |
|       | ALP    | 0.1         | 860.06     | 0.7    | 0.3    | 0.45    | 0.5    |
|       |        | (0.27)      | (254.66)   | (0.06) | (0.06) | (0.03)  | (0.02) |
|       | GM-ALP | 1.88        | 5.04       | 0.6    | 0.4    | 0.48    | 0.5    |
|       |        | (1.58)      | (7.58)     | (0.08) | (0.09) | (0.03)  | (0.02) |
|       | AHP    | 1.17        | 252.48     | 0.7    | 0.3    | 0.45    | 0.5    |
|       |        | (1.44)      | (362.18)   | (0.05) | (0.06) | (0.03)  | (0.02) |
|       | GM-AHP | 1.2         | 27.32      | 0.68   | 0.31   | 0.46    | 0.5    |
|       |        | (1.38)      | (40.65)    | (0.05) | (0.06) | (0.03)  | (0.02) |

Table 2: **Classification results under the alternative hypothesis for a small number of variables ( $p = 1000$ ) and the correlated scenario ( $\rho = 0.8$ ).** The table shows optimal threshold parameter ( $\lambda^*$ ), number of active relevant variables (# info), number of active irrelevant variables (# non-info), PA for class 1 ( $PA_1$ ) and PA for class 2 ( $PA_2$ ), g-means and AUC for different levels of class-imbalance ( $k_1$ ) in the training set containing 100 samples. The differences between the classes were moderate ( $\mu_2 = 1$ ; 20 variables were differentially expressed (100 for AHP)).

| $k_1$ | Method | $\lambda^*$ | # info  | # non-info | $PA_1$ | $PA_2$ | g-means | AUC    |
|-------|--------|-------------|---------|------------|--------|--------|---------|--------|
| 0.5   | PAM    | 2.17        | 12.52   | 21.84      | 0.7    | 0.7    | 0.7     | 0.77   |
|       |        | (0.82)      | (7.6)   | (82.87)    | (0.05) | (0.05) | (0.03)  | (0.04) |
|       | GM-PAM | 2.14        | 12.43   | 22.15      | 0.7    | 0.7    | 0.7     | 0.77   |
|       |        | (0.81)      | (7.57)  | (88.05)    | (0.05) | (0.05) | (0.03)  | (0.04) |
|       | ALP    | 10.57       | 13.84   | 26.08      | 0.7    | 0.7    | 0.7     | 0.74   |
|       |        | (6.35)      | (6)     | (138.93)   | (0.05) | (0.05) | (0.03)  | (0.04) |
|       | GM-ALP | 10.11       | 14.36   | 27.1       | 0.7    | 0.7    | 0.7     | 0.74   |
|       |        | (6.41)      | (5.96)  | (138.91)   | (0.05) | (0.05) | (0.03)  | (0.04) |
|       | AHP    | 13.9        | 55.86   | 58.34      | 0.7    | 0.71   | 0.71    | 0.74   |
|       |        | (10.91)     | (35.6)  | (215.27)   | (0.03) | (0.04) | (0.01)  | (0.02) |
|       | GM-AHP | 13.6        | 57.54   | 58.34      | 0.7    | 0.71   | 0.71    | 0.74   |
|       |        | (10.58)     | (34.73) | (215.27)   | (0.03) | (0.04) | (0.01)  | (0.02) |
| 0.6   | PAM    | 2.05        | 13.08   | 16.42      | 0.68   | 0.73   | 0.7     | 0.78   |
|       |        | (0.81)      | (7.55)  | (52.05)    | (0.05) | (0.05) | (0.03)  | (0.04) |
|       | GM-PAM | 2.11        | 12.34   | 13.89      | 0.67   | 0.73   | 0.7     | 0.77   |
|       |        | (0.78)      | (7.81)  | (49.1)     | (0.05) | (0.05) | (0.03)  | (0.03) |
|       | ALP    | 9.61        | 15.4    | 6.32       | 0.68   | 0.73   | 0.7     | 0.74   |
|       |        | (5.31)      | (5.93)  | (23.61)    | (0.04) | (0.05) | (0.03)  | (0.03) |
|       | GM-ALP | 9.75        | 15.08   | 6.32       | 0.68   | 0.73   | 0.7     | 0.74   |
|       |        | (5.27)      | (6.19)  | (23.61)    | (0.04) | (0.05) | (0.03)  | (0.03) |
|       | AHP    | 13.96       | 60.26   | 81.64      | 0.71   | 0.71   | 0.71    | 0.74   |
|       |        | (11.22)     | (33.12) | (245.27)   | (0.04) | (0.04) | (0.01)  | (0.02) |
|       | GM-AHP | 13.6        | 64.86   | 80.52      | 0.71   | 0.71   | 0.71    | 0.74   |
|       |        | (11.09)     | (30.14) | (245.49)   | (0.04) | (0.04) | (0.01)  | (0.02) |
| 0.7   | PAM    | 1.64        | 14.99   | 43.47      | 0.65   | 0.73   | 0.69    | 0.76   |
|       |        | (0.72)      | (7.42)  | (134.27)   | (0.05) | (0.07) | (0.04)  | (0.06) |
|       | GM-PAM | 1.8         | 13.91   | 27.79      | 0.65   | 0.74   | 0.69    | 0.77   |
|       |        | (0.74)      | (7.64)  | (89.27)    | (0.05) | (0.06) | (0.04)  | (0.05) |
|       | ALP    | 4.78        | 17.6    | 69.16      | 0.67   | 0.72   | 0.7     | 0.73   |
|       |        | (3.9)       | (4.99)  | (207.88)   | (0.05) | (0.08) | (0.05)  | (0.06) |
|       | GM-ALP | 5.86        | 16.44   | 14.24      | 0.67   | 0.74   | 0.71    | 0.74   |
|       |        | (4.19)      | (5.76)  | (38.51)    | (0.06) | (0.06) | (0.04)  | (0.05) |
|       | AHP    | 12.75       | 47.36   | 67.18      | 0.71   | 0.7    | 0.7     | 0.74   |
|       |        | (10.1)      | (33.68) | (216.58)   | (0.04) | (0.04) | (0.02)  | (0.02) |
|       | GM-AHP | 11.83       | 56.88   | 52.36      | 0.71   | 0.7    | 0.7     | 0.74   |
|       |        | (9.9)       | (32.36) | (180.61)   | (0.04) | (0.04) | (0.02)  | (0.02) |
| 0.8   | PAM    | 1.12        | 17.36   | 164.61     | 0.65   | 0.69   | 0.67    | 0.74   |
|       |        | (0.66)      | (5.89)  | (304.3)    | (0.05) | (0.13) | (0.07)  | (0.08) |
|       | GM-PAM | 1.53        | 14.29   | 51.69      | 0.63   | 0.74   | 0.68    | 0.76   |
|       |        | (0.62)      | (7.52)  | (155.81)   | (0.06) | (0.1)  | (0.05)  | (0.07) |
|       | ALP    | 2.96        | 18.24   | 123.66     | 0.68   | 0.68   | 0.67    | 0.73   |
|       |        | (2.36)      | (4.61)  | (252.95)   | (0.05) | (0.11) | (0.06)  | (0.07) |
|       | GM-ALP | 4.88        | 15.72   | 58.5       | 0.66   | 0.71   | 0.68    | 0.72   |
|       |        | (3.33)      | (5.99)  | (174.25)   | (0.05) | (0.1)  | (0.05)  | (0.05) |
|       | AHP    | 8.78        | 43.94   | 87.58      | 0.72   | 0.68   | 0.7     | 0.74   |
|       |        | (6.84)      | (34.95) | (249.36)   | (0.04) | (0.06) | (0.02)  | (0.02) |
|       | GM-AHP | 8.83        | 50.14   | 67.82      | 0.73   | 0.69   | 0.7     | 0.74   |
|       |        | (6.7)       | (34.74) | (218.97)   | (0.04) | (0.05) | (0.02)  | (0.02) |
| 0.9   | PAM    | 0.26        | 19.83   | 705.08     | 0.71   | 0.45   | 0.55    | 0.61   |
|       |        | (0.4)       | (1.26)  | (374.47)   | (0.06) | (0.17) | (0.08)  | (0.09) |
|       | GM-PAM | 1.21        | 12.74   | 108.62     | 0.6    | 0.68   | 0.63    | 0.7    |
|       |        | (0.53)      | (8.22)  | (228.62)   | (0.07) | (0.16) | (0.08)  | (0.11) |
|       | ALP    | 0.75        | 19.74   | 524.76     | 0.72   | 0.47   | 0.57    | 0.64   |
|       |        | (1.02)      | (1.7)   | (423.88)   | (0.05) | (0.18) | (0.1)   | (0.09) |
|       | GM-ALP | 2.81        | 14.48   | 154.28     | 0.65   | 0.63   | 0.63    | 0.68   |
|       |        | (2.19)      | (7.3)   | (303.08)   | (0.08) | (0.18) | (0.1)   | (0.1)  |
|       | AHP    | 3.16        | 62.54   | 238.2      | 0.77   | 0.59   | 0.67    | 0.73   |
|       |        | (4.16)      | (39.48) | (363.93)   | (0.05) | (0.09) | (0.05)  | (0.03) |
|       | GM-AHP | 3.8         | 56.6    | 87.86      | 0.76   | 0.61   | 0.68    | 0.73   |
|       |        | (3.86)      | (37.87) | (219.83)   | (0.05) | (0.09) | (0.04)  | (0.04) |
