# Supplementary material for: Improved shrunken centroid classifiers for high-dimensional class-imbalanced data
Source: PubMed Central journal article supplement (PMC3687811; doi:10.1186/1471-2105-14-64), 2013-02-23
Supplement: 1471-2105-14-64-S9.pdf [file 1471-2105-14-64-S9.pdf]

Table 1: **Multi-class classification results for the class-balanced scenario** ( $n_1 = n_2 = n_3 = 100$ ) **and a large number of variables** ( $p = 5000$ ) **under the null hypothesis**. In the table we report the average number and standard deviation (in brackets) of active irrelevant variables ( $\#$  non-info), optimal threshold parameter ( $\lambda^*$ ), class-specific PAs ( $PA_1, PA_2, PA_3$ ) and g-means for different methods. There was no difference between the classes ( $\mu_1 = 0$ ).

| Method | $\lambda^*$    | $\#$ non-info        | $PA_1$         | $PA_2$         | $PA_3$         | g-means        |
|--------|----------------|----------------------|----------------|----------------|----------------|----------------|
| PAM    | 1.23<br>(0.63) | 1060.67<br>(1719.31) | 0.33<br>(0.11) | 0.33<br>(0.12) | 0.33<br>(0.12) | 0.31<br>(0.03) |
| GM-PAM | 1.08<br>(0.66) | 1436.99<br>(1880.97) | 0.33<br>(0.07) | 0.33<br>(0.08) | 0.34<br>(0.08) | 0.32<br>(0.02) |
| ALP    | 3.77<br>(2.6)  | 962.82<br>(1600.19)  | 0.37<br>(0.09) | 0.33<br>(0.13) | 0.3<br>(0.14)  | 0.26<br>(0.13) |
| GM-ALP | 2.93<br>(2.67) | 1498.77<br>(1904.14) | 0.35<br>(0.09) | 0.33<br>(0.1)  | 0.32<br>(0.12) | 0.29<br>(0.11) |
| AHP    | 3.56<br>(2.65) | 1203.8<br>(1846.18)  | 0.37<br>(0.09) | 0.35<br>(0.12) | 0.27<br>(0.15) | 0.24<br>(0.14) |
| GM-AHP | 3<br>(2.87)    | 1648.55<br>(1999.59) | 0.35<br>(0.07) | 0.33<br>(0.1)  | 0.31<br>(0.12) | 0.28<br>(0.11) |

Table 2: **Multi-class classification results for the class-balanced scenario** ( $n_1 = n_2 = n_3 = 100$ ) **and a large number of variables** ( $p = 5000$ ) **under the alternative hypothesis**. In the table we report the average number and standard deviation (in brackets) of active relevant variables (out of 100;  $\#$  info) and active irrelevant variables ( $\#$  non-info), optimal threshold parameter ( $\lambda^*$ ), class-specific PAs ( $PA_1, PA_2, PA_3$ ) and g-means for different methods. The difference between the classes was moderate ( $\mu_1 = 1$ ).

| Method | $\lambda^*$      | $\#$ info       | $\#$ non-info        | $PA_1$         | $PA_2$         | $PA_3$         | g-means        |
|--------|------------------|-----------------|----------------------|----------------|----------------|----------------|----------------|
| PAM    | 1.98<br>(1.27)   | 99<br>(8.81)    | 388.3<br>(791.72)    | 0.77<br>(0.05) | 0.29<br>(0.09) | 0.76<br>(0.05) | 0.54<br>(0.06) |
| GM-PAM | 0.85<br>(0.41)   | 100<br>(0.00)   | 1310.99<br>(1368.33) | 0.73<br>(0.04) | 0.36<br>(0.04) | 0.73<br>(0.04) | 0.58<br>(0.02) |
| ALP    | 19.97<br>(17.43) | 98.69<br>(7.31) | 28.39<br>(56.62)     | 0.76<br>(0.05) | 0.32<br>(0.10) | 0.76<br>(0.05) | 0.55<br>(0.06) |
| GM-ALP | 5.87<br>(4.53)   | 100<br>(0.00)   | 298.54<br>(1063.33)  | 0.72<br>(0.04) | 0.39<br>(0.03) | 0.72<br>(0.04) | 0.59<br>(0.02) |
| AHP    | 18.24<br>(14.72) | 99.17<br>(5.87) | 27.37<br>(82.63)     | 0.75<br>(0.04) | 0.33<br>(0.09) | 0.75<br>(0.05) | 0.56<br>(0.05) |
| GM-AHP | 5.69<br>(4.52)   | 100<br>(0.00)   | 450.2<br>(1321.77)   | 0.72<br>(0.04) | 0.39<br>(0.04) | 0.71<br>(0.04) | 0.59<br>(0.02) |

Table 3: **Multi-class classification results for the class-imbalanced scenario** ( $n_1 = n_3 = 100$ ,  $n_2 = 20$ ) **under the null hypothesis**. In the table we report the average number and standard deviation (in brackets) of active irrelevant variables (out of  $p = 1000$  or  $5000$ ; # non-info), optimal threshold parameter ( $\lambda^*$ ), class-specific PAs ( $PA_1$ ,  $PA_2$ ,  $PA_3$ ) and g-means for different methods. There was no difference between the classes ( $\mu_1 = 0$ ).

| $p$    | Method | $\lambda^*$ | # non-info | $PA_1$ | $PA_2$ | $PA_3$ | g-means |
|--------|--------|-------------|------------|--------|--------|--------|---------|
| 1000   | PAM    | 0.97        | 330.17     | 0.38   | 0.26   | 0.37   | 0.3     |
|        |        | (0.66)      | (444.16)   | (0.12) | (0.11) | (0.12) | (0.05)  |
|        | GM-PAM | 0.96        | 313.43     | 0.34   | 0.33   | 0.33   | 0.32    |
|        |        | (0.6)       | (404.05)   | (0.09) | (0.11) | (0.1)  | (0.03)  |
|        | ALP    | 0.91        | 646.53     | 0.36   | 0.31   | 0.34   | 0.31    |
|        |        | (1.44)      | (386.93)   | (0.1)  | (0.08) | (0.1)  | (0.05)  |
|        | GM-ALP | 1.78        | 457.27     | 0.34   | 0.35   | 0.31   | 0.29    |
|        |        | (2.00)      | (404.72)   | (0.13) | (0.08) | (0.13) | (0.08)  |
| AHP    | 0.93   | 643.62      | 0.33       | 0.32   | 0.34   | 0.31   |         |
|        | (1.61) | (399.6)     | (0.11)     | (0.08) | (0.1)  | (0.05) |         |
| GM-AHP | 1.53   | 520.89      | 0.34       | 0.34   | 0.31   | 0.29   |         |
|        | (2.05) | (421.31)    | (0.11)     | (0.08) | (0.12) | (0.08) |         |
| 5000   | PAM    | 0.64        | 3101.86    | 0.4    | 0.2    | 0.41   | 0.3     |
|        |        | (0.79)      | (2310.45)  | (0.1)  | (0.08) | (0.09) | (0.03)  |
|        | GM-PAM | 1.1         | 1304.05    | 0.34   | 0.31   | 0.35   | 0.32    |
|        |        | (0.63)      | (1758.05)  | (0.08) | (0.1)  | (0.07) | (0.02)  |
|        | ALP    | 0.85        | 3596.27    | 0.4    | 0.21   | 0.38   | 0.3     |
|        |        | (1.77)      | (1886.72)  | (0.07) | (0.09) | (0.08) | (0.05)  |
|        | GM-ALP | 2.64        | 1340.91    | 0.34   | 0.31   | 0.34   | 0.3     |
|        |        | (2.33)      | (1535.67)  | (0.12) | (0.1)  | (0.11) | (0.06)  |
| AHP    | 0.5    | 3748.31     | 0.4        | 0.21   | 0.39   | 0.31   |         |
|        | (0.93) | (1670.28)   | (0.07)     | (0.07) | (0.06) | (0.02) |         |
| GM-AHP | 2.85   | 1336.29     | 0.35       | 0.32   | 0.33   | 0.29   |         |
|        | (2.6)  | (1626.17)   | (0.14)     | (0.1)  | (0.14) | (0.07) |         |

Table 4: **Multi-class classification results for the class-imbalanced scenario** ( $n_1 = n_3 = 100$ ,  $n_2 = 20$ ) **under the alternative hypothesis**. In the table we report the average number and standard deviation (in brackets) of active relevant variables (out of 100; # info) and active irrelevant variables (out of 900 or 4900; # non-info), optimal threshold parameter ( $\lambda^*$ ), class-specific PAs ( $PA_1$ ,  $PA_2$ ,  $PA_3$ ) and g-means for different methods. The difference between the classes was moderate ( $\mu_1 = 0.5$ ).

| $p$  | Method | $\lambda^*$ | # info  | # non-info | $PA_1$ | $PA_2$ | $PA_3$ | g-means |
|------|--------|-------------|---------|------------|--------|--------|--------|---------|
| 1000 | PAM    | 3.34        | 56.03   | 0          | 0.7    | 0.03   | 0.7    | 0.24    |
|      |        | (0.51)      | (31.53) | (0.04)     | (0.03) | (0.01) | (0.03) | (0.03)  |
|      | GM-PAM | 0.94        | 91.56   | 406.51     | 0.59   | 0.2    | 0.59   | 0.4     |
|      |        | (1.06)      | (27.16) | (355.76)   | (0.09) | (0.07) | (0.09) | (0.04)  |
|      | ALP    | 9.71        | 99.97   | 15.74      | 0.65   | 0.12   | 0.66   | 0.36    |
|      |        | (5.52)      | (0.17)  | (65.57)    | (0.06) | (0.05) | (0.06) | (0.04)  |
|      | GM-ALP | 5.12        | 95.06   | 265.16     | 0.57   | 0.22   | 0.58   | 0.4     |
|      |        | (7.25)      | (21.18) | (373.33)   | (0.14) | (0.07) | (0.14) | (0.05)  |
|      | AHP    | 10.46       | 99.93   | 17.59      | 0.66   | 0.11   | 0.66   | 0.36    |
|      |        | (5.00)      | (0.70)  | (98)       | (0.05) | (0.04) | (0.05) | (0.03)  |
|      | GM-AHP | 5.96        | 91.86   | 284.23     | 0.58   | 0.22   | 0.57   | 0.39    |
|      |        | (9.07)      | (26.37) | (370.9)    | (0.13) | (0.09) | (0.14) | (0.07)  |
| 5000 | PAM    | 3.35        | 52.75   | 0.76       | 0.7    | 0.03   | 0.7    | 0.24    |
|      |        | (0.49)      | (32.41) | (14.55)    | (0.04) | (0.02) | (0.03) | (0.03)  |
|      | GM-PAM | 1.25        | 88.21   | 1364.98    | 0.6    | 0.18   | 0.59   | 0.39    |
|      |        | (1.11)      | (31.22) | (1489.87)  | (0.09) | (0.07) | (0.09) | (0.05)  |
|      | ALP    | 10.59       | 99.92   | 247.38     | 0.66   | 0.11   | 0.65   | 0.35    |
|      |        | (5.5)       | (0.37)  | (990.3)    | (0.05) | (0.05) | (0.08) | (0.04)  |
|      | GM-ALP | 6.42        | 92.16   | 902.72     | 0.59   | 0.2    | 0.58   | 0.38    |
|      |        | (8.22)      | (24.18) | (1403.05)  | (0.13) | (0.1)  | (0.15) | (0.06)  |
|      | AHP    | 9.49        | 99.84   | 243.91     | 0.65   | 0.12   | 0.65   | 0.35    |
|      |        | (5.49)      | (1.12)  | (971.89)   | (0.06) | (0.06) | (0.08) | (0.05)  |
|      | GM-AHP | 5.88        | 92.39   | 933.81     | 0.58   | 0.21   | 0.58   | 0.38    |
|      |        | (7.89)      | (24.91) | (1408.52)  | (0.13) | (0.09) | (0.13) | (0.06)  |

Table 5: **Multi-class classification results for the class-imbalanced scenario** ( $n_1 = n_3 = 100$ ,  $n_2 = 20$ ) **and a smaller number of variables** ( $p = 1000$ ). In the table we report the average number and standard deviation (in brackets) of active relevant variables (out of 100; # info) and active irrelevant variables (# non-info), optimal threshold parameter ( $\lambda^*$ ), class-specific PAs ( $PA_1$ ,  $PA_2$ ,  $PA_3$ ) and g-means for different methods. The difference between the classes was moderate ( $\mu_1 = 1$ ).

| Method | $\lambda^*$ | # info  | # non-info | $PA_1$ | $PA_2$ | $PA_3$ | g-means |
|--------|-------------|---------|------------|--------|--------|--------|---------|
| PAM    | 6.55        | 61.12   | 0          | 0.86   | 0.04   | 0.86   | 0.29    |
|        | (0.62)      | (32.99) | (0)        | (0.02) | (0.02) | (0.02) | (0.05)  |
| GM-PAM | 1.07        | 100     | 285.29     | 0.74   | 0.33   | 0.74   | 0.57    |
|        | (0.89)      | (0)     | (328.57)   | (0.04) | (0.05) | (0.04) | (0.03)  |
| ALP    | 61.24       | 100     | 0          | 0.83   | 0.14   | 0.83   | 0.45    |
|        | (13.46)     | (0)     | (0)        | (0.04) | (0.05) | (0.04) | (0.05)  |
| GM-ALP | 10.36       | 100     | 172.2      | 0.73   | 0.35   | 0.73   | 0.57    |
|        | (9.55)      | (0)     | (352.25)   | (0.05) | (0.06) | (0.05) | (0.03)  |
| AHP    | 60.31       | 100     | 0          | 0.81   | 0.15   | 0.82   | 0.46    |
|        | (15.26)     | (0)     | (0)        | (0.04) | (0.05) | (0.04) | (0.05)  |
| GM-AHP | 10.08       | 100     | 217.3      | 0.73   | 0.35   | 0.73   | 0.57    |
|        | (11.94)     | (0)     | (383.19)   | (0.05) | (0.06) | (0.05) | (0.03)  |
