# Supplementary material for: Improved shrunken centroid classifiers for high-dimensional class-imbalanced data
Source: PubMed Central journal article supplement (PMC3687811; doi:10.1186/1471-2105-14-64), 2013-02-23
Supplement: 1471-2105-14-64-S10.pdf [file 1471-2105-14-64-S10.pdf]

Error

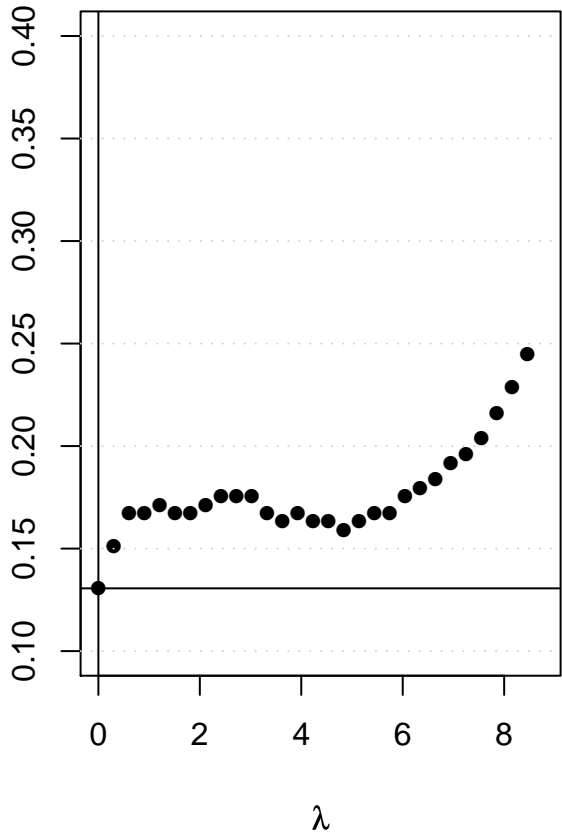 $\lambda$ 

Accuracy

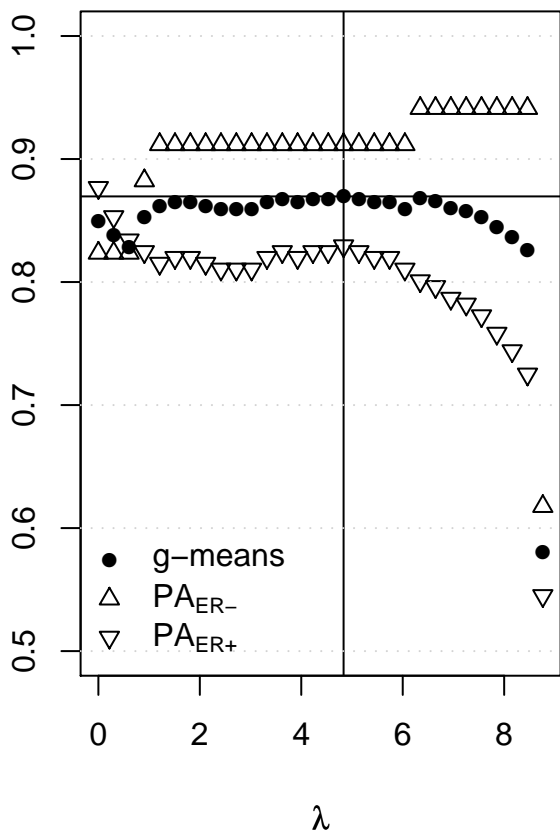 $\lambda$ 

● g-means  
△  $PA_{ER-}$   
▽  $PA_{ER+}$
