# Supplementary material for: Improved shrunken centroid classifiers for high-dimensional class-imbalanced data
Source: PubMed Central journal article supplement (PMC3687811; doi:10.1186/1471-2105-14-64), 2013-02-23
Supplement: 1471-2105-14-64-S11.pdf [file 1471-2105-14-64-S11.pdf]

Table 1: **Results on the Sotiriou (2003) data set for classification of ER and Grade of the tumor.** In the table we report overall PA (PA), class specific PAs ( $PA_1$ ,  $PA_2$ ), g-means, AUC, number of active genes (# gene) and the optimal threshold parameter ( $\lambda^*$ ), for different number of ER- or Grade 1 or 2 samples in the training set ( $n_1$ ). The number of ER+ and Grade 3 samples was kept fixed at 10.

| Task  | Method | $n_1$ | PA    | $PA_1$ | $PA_2$ | g-means | AUC   | # genes | $\lambda^*$ |
|-------|--------|-------|-------|--------|--------|---------|-------|---------|-------------|
| ER    | PAM    | 10    | 0.831 | 0.833  | 0.829  | 0.827   | 0.893 | 267     | 2.900       |
|       | GM-PAM | 10    | 0.831 | 0.833  | 0.827  | 0.827   | 0.893 | 322     | 2.852       |
|       | PAM    | 20    | 0.832 | 0.830  | 0.836  | 0.830   | 0.893 | 933     | 2.474       |
|       | GM-PAM | 20    | 0.830 | 0.824  | 0.843  | 0.831   | 0.895 | 693     | 2.598       |
|       | PAM    | 30    | 0.829 | 0.844  | 0.808  | 0.822   | 0.883 | 1892    | 1.799       |
|       | GM-PAM | 30    | 0.832 | 0.831  | 0.835  | 0.830   | 0.896 | 944     | 2.266       |
|       | PAM    | 40    | 0.827 | 0.856  | 0.796  | 0.822   | 0.875 | 3132    | 1.259       |
|       | GM-PAM | 40    | 0.831 | 0.828  | 0.834  | 0.828   | 0.894 | 1287    | 2.041       |
|       | PAM    | 50    | 0.808 | 0.889  | 0.757  | 0.817   | 0.865 | 4525    | 0.703       |
|       | GM-PAM | 50    | 0.834 | 0.846  | 0.827  | 0.833   | 0.896 | 1527    | 1.791       |
|       | ALP    | 10    | 0.829 | 0.834  | 0.819  | 0.823   | 0.877 | 70      | 21.910      |
|       | GM-ALP | 10    | 0.829 | 0.834  | 0.817  | 0.822   | 0.877 | 90      | 21.763      |
|       | ALP    | 20    | 0.848 | 0.850  | 0.844  | 0.845   | 0.898 | 333     | 16.498      |
|       | GM-ALP | 20    | 0.846 | 0.847  | 0.844  | 0.844   | 0.897 | 342     | 16.722      |
|       | ALP    | 30    | 0.845 | 0.856  | 0.830  | 0.841   | 0.903 | 1106    | 11.303      |
|       | GM-ALP | 30    | 0.844 | 0.848  | 0.838  | 0.841   | 0.900 | 572     | 13.434      |
|       | ALP    | 40    | 0.834 | 0.868  | 0.798  | 0.829   | 0.905 | 1864    | 9.099       |
|       | GM-ALP | 40    | 0.843 | 0.858  | 0.829  | 0.841   | 0.907 | 610     | 11.590      |
|       | ALP    | 50    | 0.824 | 0.883  | 0.786  | 0.830   | 0.906 | 2755    | 6.923       |
|       | GM-ALP | 50    | 0.840 | 0.860  | 0.827  | 0.841   | 0.903 | 594     | 12.710      |
|       | AHP    | 10    | 0.854 | 0.860  | 0.839  | 0.847   | 0.902 | 212     | 32.995      |
|       | GM-AHP | 10    | 0.854 | 0.860  | 0.839  | 0.847   | 0.902 | 212     | 32.608      |
|       | AHP    | 20    | 0.863 | 0.880  | 0.831  | 0.853   | 0.914 | 212     | 35.653      |
|       | GM-AHP | 20    | 0.862 | 0.879  | 0.829  | 0.851   | 0.914 | 272     | 34.800      |
|       | AHP    | 30    | 0.860 | 0.899  | 0.804  | 0.848   | 0.908 | 399     | 38.455      |
|       | GM-AHP | 30    | 0.861 | 0.899  | 0.806  | 0.849   | 0.909 | 324     | 40.269      |
|       | AHP    | 40    | 0.859 | 0.911  | 0.806  | 0.855   | 0.910 | 381     | 38.345      |
|       | GM-AHP | 40    | 0.860 | 0.910  | 0.807  | 0.856   | 0.911 | 351     | 38.746      |
|       | AHP    | 50    | 0.833 | 0.912  | 0.784  | 0.842   | 0.908 | 336     | 37.445      |
|       | GM-AHP | 50    | 0.836 | 0.914  | 0.787  | 0.845   | 0.909 | 303     | 38.261      |
| Grade | PAM    | 10    | 0.599 | 0.622  | 0.572  | 0.585   | 0.629 | 508     | 1.959       |
|       | GM-PAM | 10    | 0.600 | 0.623  | 0.571  | 0.586   | 0.632 | 536     | 1.893       |
|       | PAM    | 20    | 0.616 | 0.673  | 0.562  | 0.607   | 0.665 | 1266    | 1.662       |
|       | GM-PAM | 20    | 0.615 | 0.665  | 0.566  | 0.605   | 0.662 | 761     | 1.835       |
|       | PAM    | 30    | 0.607 | 0.720  | 0.529  | 0.608   | 0.667 | 2945    | 1.110       |
|       | GM-PAM | 30    | 0.616 | 0.673  | 0.576  | 0.615   | 0.667 | 1014    | 1.713       |
|       | PAM    | 40    | 0.566 | 0.771  | 0.485  | 0.601   | 0.660 | 4866    | 0.527       |
|       | GM-PAM | 40    | 0.595 | 0.686  | 0.559  | 0.608   | 0.661 | 1440    | 1.566       |
|       | ALP    | 10    | 0.611 | 0.637  | 0.579  | 0.598   | 0.656 | 525     | 8.190       |
|       | GM-ALP | 10    | 0.618 | 0.647  | 0.582  | 0.605   | 0.661 | 567     | 7.471       |
|       | ALP    | 20    | 0.621 | 0.690  | 0.554  | 0.608   | 0.662 | 932     | 7.907       |
|       | GM-ALP | 20    | 0.620 | 0.675  | 0.566  | 0.610   | 0.662 | 551     | 8.224       |
|       | ALP    | 30    | 0.608 | 0.740  | 0.517  | 0.609   | 0.684 | 2219    | 5.435       |
|       | GM-ALP | 30    | 0.610 | 0.699  | 0.549  | 0.613   | 0.670 | 871     | 7.414       |
|       | ALP    | 40    | 0.571 | 0.757  | 0.497  | 0.603   | 0.698 | 3519    | 3.196       |
|       | GM-ALP | 40    | 0.597 | 0.696  | 0.558  | 0.615   | 0.682 | 739     | 6.802       |
|       | AHP    | 10    | 0.589 | 0.607  | 0.566  | 0.579   | 0.614 | 438     | 13.207      |
|       | GM-AHP | 10    | 0.599 | 0.607  | 0.588  | 0.591   | 0.627 | 446     | 11.695      |
|       | AHP    | 20    | 0.619 | 0.731  | 0.510  | 0.602   | 0.673 | 445     | 10.074      |
|       | GM-AHP | 20    | 0.618 | 0.728  | 0.510  | 0.601   | 0.671 | 434     | 10.323      |
|       | AHP    | 30    | 0.593 | 0.774  | 0.470  | 0.597   | 0.679 | 463     | 9.875       |
|       | GM-AHP | 30    | 0.591 | 0.759  | 0.476  | 0.595   | 0.669 | 309     | 10.941      |
|       | AHP    | 40    | 0.560 | 0.795  | 0.466  | 0.603   | 0.700 | 865     | 9.156       |
|       | GM-AHP | 40    | 0.554 | 0.780  | 0.463  | 0.593   | 0.688 | 673     | 10.521      |

Table 2: **Performance of the classifiers on the Ivshina data set for the multi class classification task.** The table shows overall PA (PA) class specific PAs ( $PA_1$ ,  $PA_2$ ,  $PA_3$ ), g-means, optimal threshold parameter ( $\lambda^*$ ) and the number of active genes (# genes) for the prediction of Grade of the tumor. Optimal threshold parameters were estimated with 5-fold CV and the accuracy measures with LOOCV.

| Method | $\lambda^*$ | # genes | PA   | $PA_1$ | $PA_2$ | $PA_3$ | g-means |
|--------|-------------|---------|------|--------|--------|--------|---------|
| PAM    | 0.00        | 22283   | 0.62 | 0.76   | 0.50   | 0.82   | 0.68    |
| GM-PAM | 0.57        | 17776   | 0.62 | 0.76   | 0.49   | 0.84   | 0.68    |
| ALP    | 0.00        | 22283   | 0.62 | 0.75   | 0.51   | 0.82   | 0.68    |
| GM-ALP | 0.00        | 22283   | 0.61 | 0.75   | 0.49   | 0.82   | 0.67    |
| AHP    | 0.00        | 22283   | 0.62 | 0.74   | 0.51   | 0.82   | 0.67    |
| GM-AHP | 0.00        | 22283   | 0.62 | 0.74   | 0.51   | 0.82   | 0.67    |
